# Supplementary material for: Non-injection synthesis of monodisperse Cu–Fe–S nanocrystals and their size dependent properties
Source: Royal Society of Chemistry journal article supplement (doi:10.1039/c6cp01887d), 2016-01-01
Supplement: c6cp01887d1.pdf [file c6cp01887d1.pdf]

Electronic Supplementary Information

**Non-injection synthesis of monodisperse Cu-Fe-S nanocrystals and their  
size dependent properties**

Grzegorz Gabka,<sup>a</sup> Piotr Bujak<sup>a\*</sup>, Jan Żukrowski,<sup>b</sup> Damian Zabost,<sup>a</sup> Kamil Kotwica,<sup>a</sup> Karolina Malinowska,<sup>c</sup> Andrzej Ostrowski,<sup>a</sup> Ireneusz Wielgus,<sup>a</sup> Wojciech Lisowski,<sup>d</sup> Janusz W. Sobczak,<sup>d</sup> Marek Przybylski<sup>b,e</sup> and Adam Pron<sup>a</sup>

<sup>a</sup>*Faculty of Chemistry, Warsaw University of Technology, Noakowskiego 3, 00-664 Warsaw, Poland. E-mail: piotr**bujak**chem@poczta.onet.pl*

<sup>b</sup>*Academic Centre for Materials and Nanotechnology, AGH University of Science and Technology, 30-059 Kraków, Poland.*

<sup>c</sup>*Faculty of Chemistry, University of Warsaw, Pasteura 1, 02-093 Warsaw, Poland.*

<sup>d</sup>*Institute of Physical Chemistry, Polish Academy of Science, Kasprzaka 44/52, 01-224 Warsaw, Poland.*

<sup>e</sup>*Faculty of Physics and Applied Computer Science, AGH University of Science and Technology, 30-059 Kraków, Poland.*

**Table S1.** Summary of the synthesis conditions and composition of Cu-Fe-S nanocrystals

|           | CuCl (mg) | FeCl <sub>3</sub> (mg) | thiourea (mg) | OA <sup>a</sup> (mg) | Cu/Fe/S/OA <sup>b</sup> | Cu/Fe/S <sup>c</sup>  |
|-----------|-----------|------------------------|---------------|----------------------|-------------------------|-----------------------|
| <b>B1</b> | 60        | 100                    | 93            | 670                  | <b>1.0/1.0/2.0/3.9</b>  | <b>1.92/1.00/2.05</b> |
| <b>B2</b> | 60        | 100                    | 93            | 361                  | <b>1.0/1.0/2.0/2.1</b>  | <b>1.62/1.00/2.01</b> |
| <b>B3</b> | 60        | 100                    | 93            | 207                  | <b>1.0/1.0/2.0/1.2</b>  | <b>1.64/1.00/2.04</b> |
| <b>B4</b> | 95        | 38                     | 63            | 950                  | <b>4.0/1.0/3.5/14.3</b> | <b>4.20/1.00/3.20</b> |
| <b>B5</b> | 24        | 155                    | 118           | 1790                 | <b>1.0/4.0/6.5/26.0</b> | <b>1.00/1.79/2.27</b> |

<sup>a</sup>oleic acid; <sup>b</sup>molar ratio of precursors; <sup>c</sup>ratio of elements in the nanocrystals from EDS

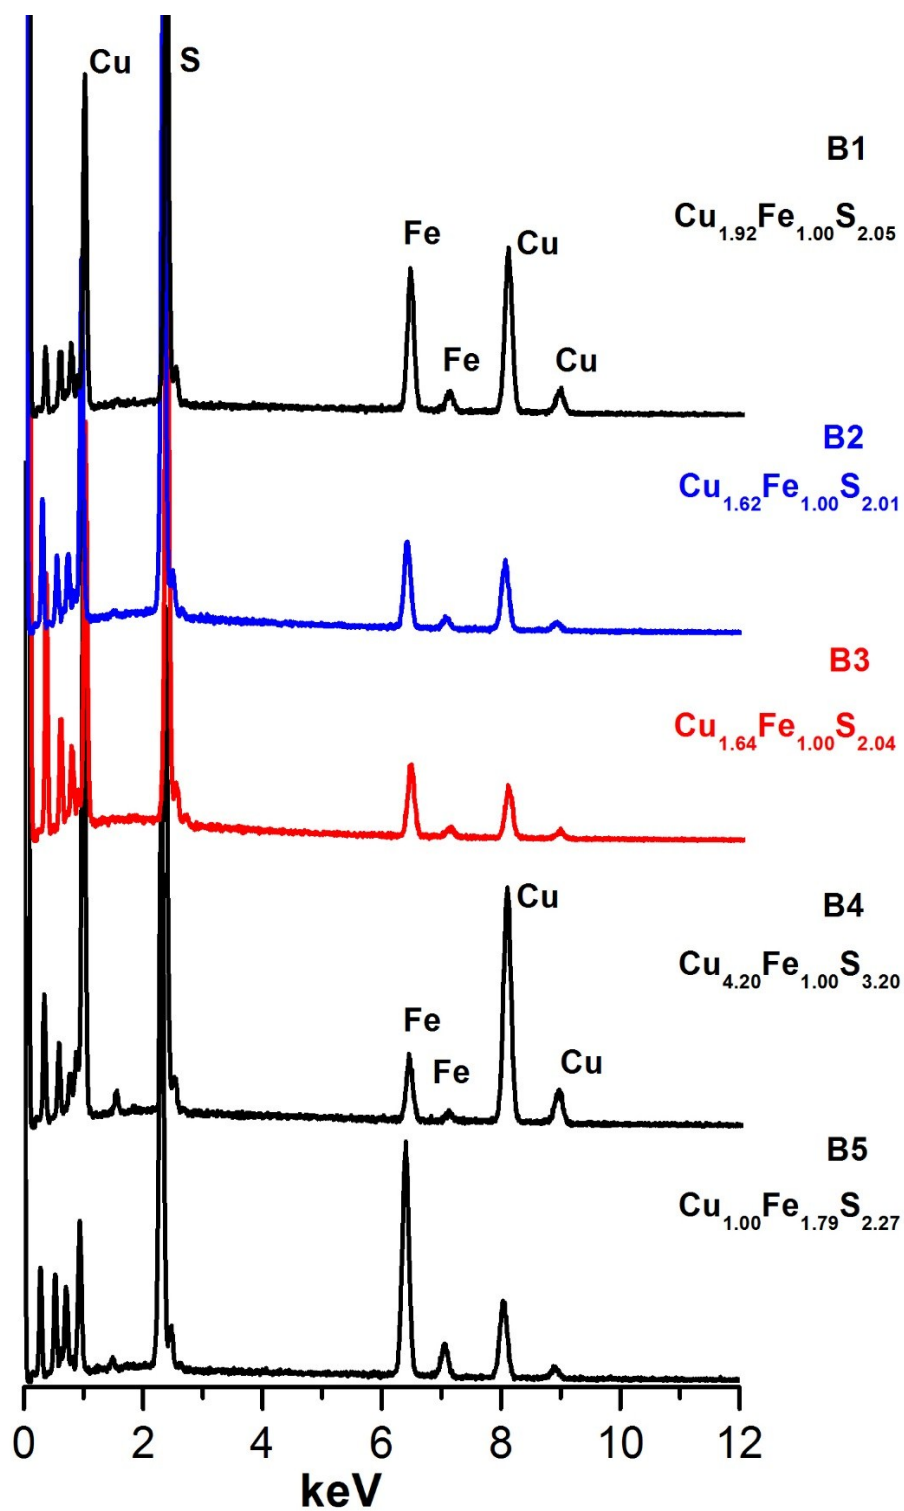

**Fig. S1** Energy-dispersive spectra of Cu-Fe-S nanocrystals of batches 1-5.

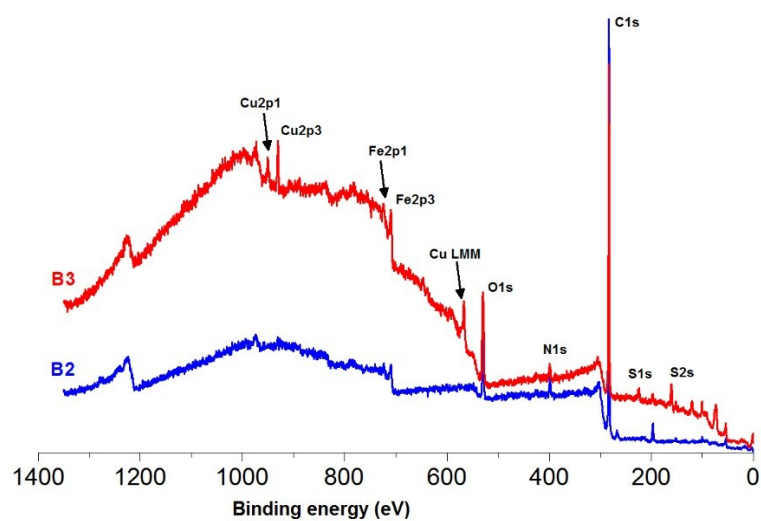

**Fig. S2** XPS survey spectra of Cu-Fe-S nanocrystals (**B2** and **B3**).

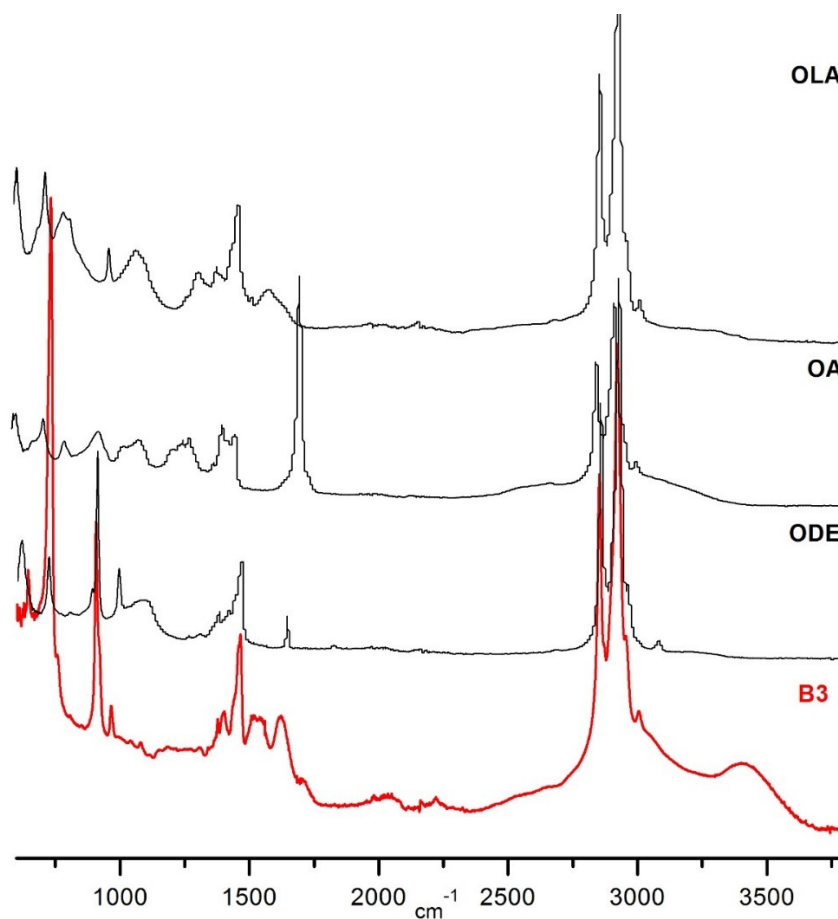

**Fig. S3** IR spectra of organic residue from Cu-Fe-S nanocrystals (**B3**), 1-octadecene (ODE), oleic acid (OA), oleylamine (OLA).

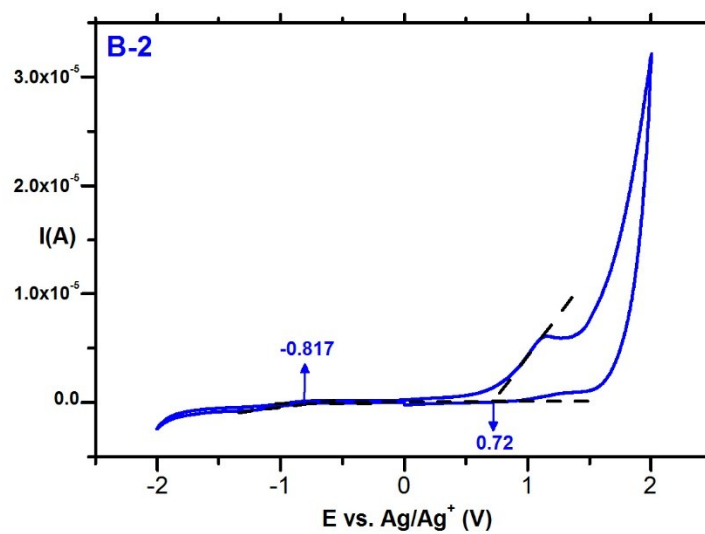

**Fig. S4** Cyclic voltammogram of  $\text{Cu}_{1.62}\text{Fe}_{1.00}\text{S}_{2.01}$  nanocrystals ( $2.7\pm 0.3$  nm) (**batch 2**).

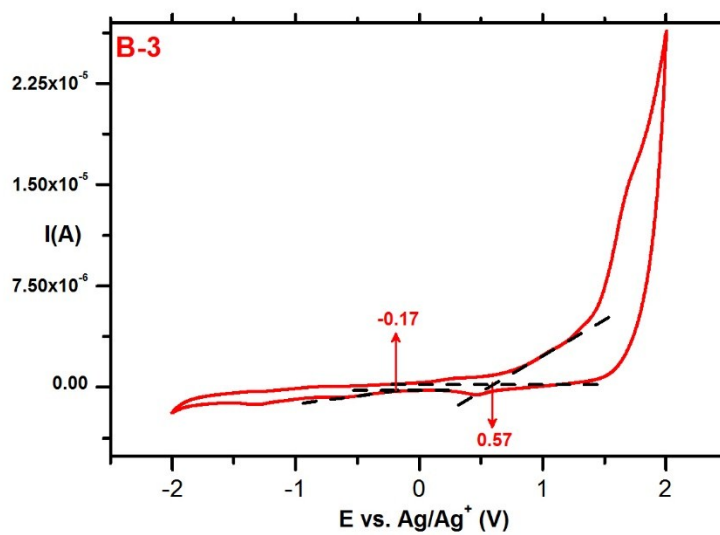

**Fig. S5** Cyclic voltammogram of  $\text{Cu}_{1.64}\text{Fe}_{1.00}\text{S}_{2.04}$  nanocrystals ( $9.3\pm 1.7$  nm) (**batch 3**).
